# Supplementary material
Source: PubMed Central journal article supplement (PMC3736322)
Supplement: NIHMS52898-supplement-SuppInfo.pdf [file NIHMS52898-supplement-SuppInfo.pdf]

**A genome-wide association study identifies susceptibility loci for non-syndromic sagittal craniosynostosis near *BMP2* and within *BBS9*.**

Cristina M. Justice, Garima Yagnik, Yoonhee Kim, Inga Peter, Ethylin Wang Jabs, Monica Erazo, Xiaoqian Ye, Edmond Ainehsazan, Lisong Shi, Michael L. Cunningham, Virginia Kimonis, Tony Roscioli, Steven A. Wall, Andrew O.M. Wilkie, Joan Stoler, Joan T. Richtsmeier, Yann Heuzé, Pedro A. Sanchez-Lara, Michael F. Buckley, Charlotte M. Druschel, James L. Mills, Michele Caggana, Paul A. Romitti, Denise M. Kay, Craig Senders, Peter J. Taub, Ophir D. Klein, James Boggan, Marike Zwienenberg-Lee, Cyril Naydenov, Jinoh Kim, Alexander F. Wilson, Simeon A. Boyadjiev

**SUPPLEMENTARY INFORMATION**

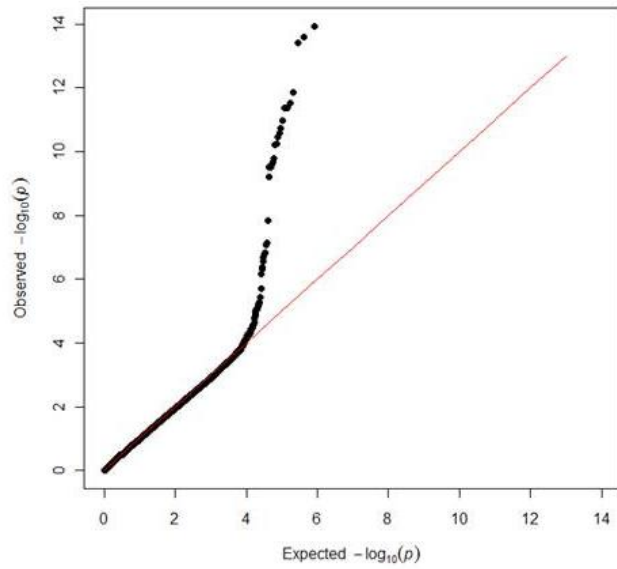

**Supplementary Figure 1.** The quantile-quantile plot of the observed P-values (obtained from the GWAS, in black) compared to the expected P-values (under the null hypothesis, in red)

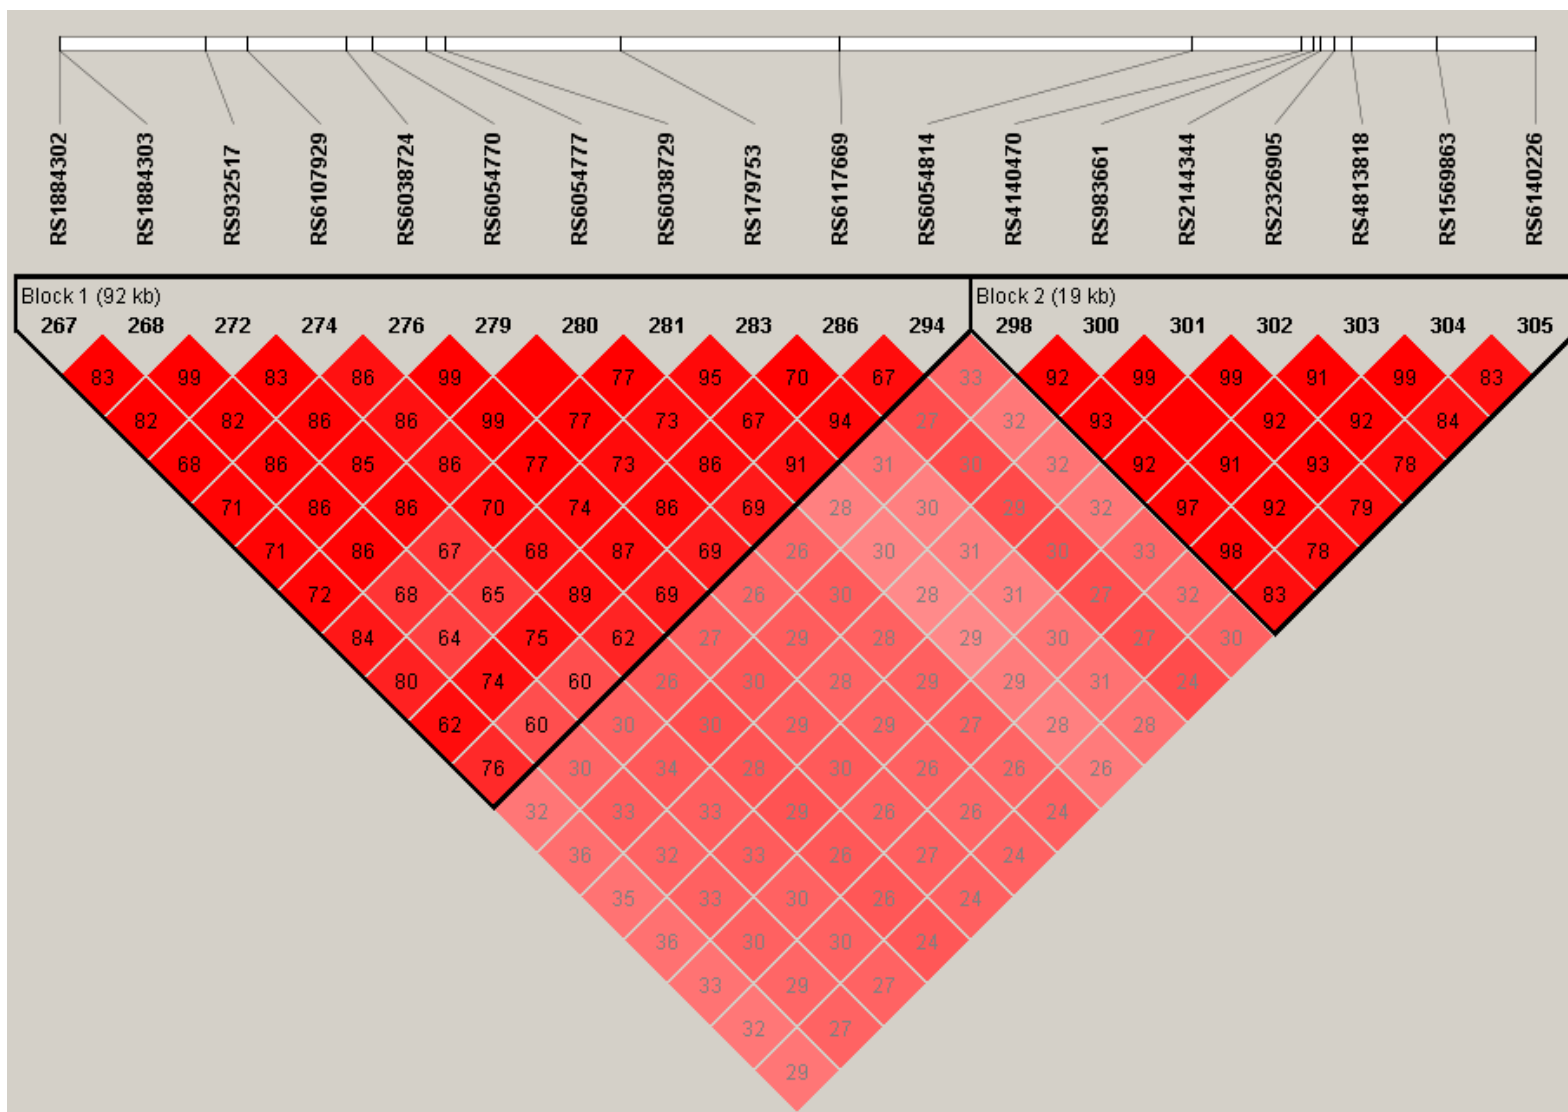

**Supplementary Figure 2.** Linkage disequilibrium pattern ( $r^2$ ) for genome-wide significant ( $P < 5 \times 10^{-8}$ ) SNPs on 20p12.13

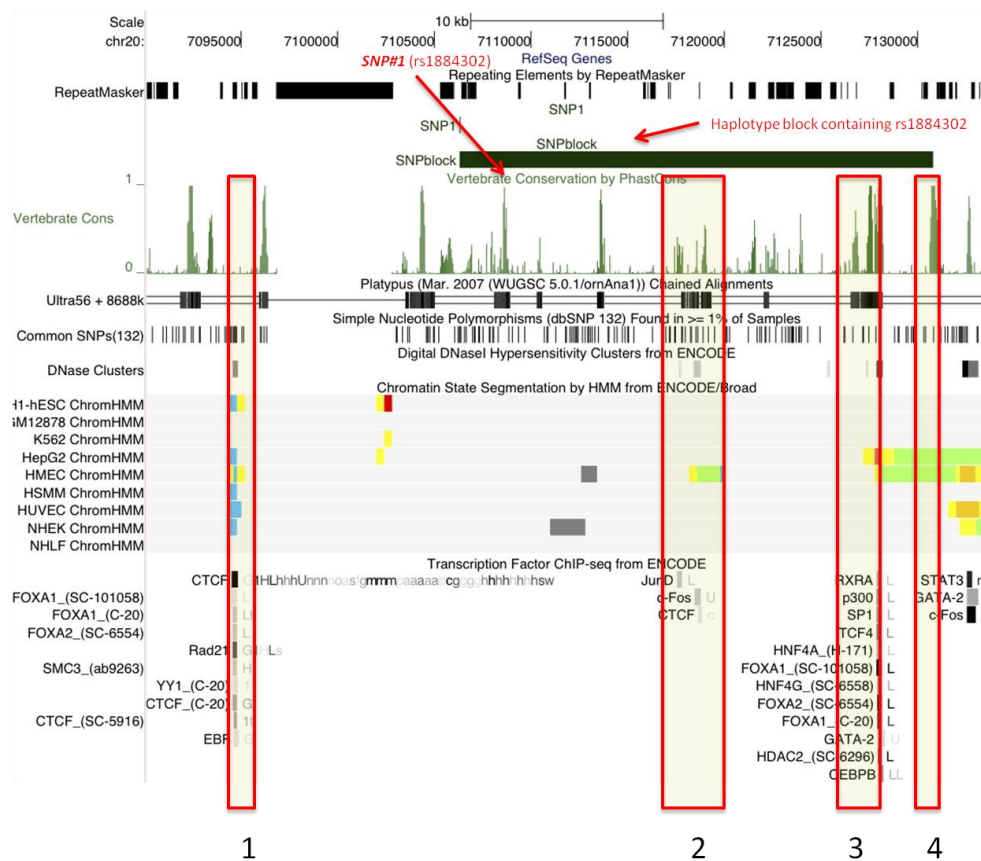

**Supplementary Figure 3:** Conserved regions on chromosome 20 within or adjacent to the associated haplotype block. All regional boundaries were defined based on human genome version hg19. Region 1 (ch20:7094394-7095215) is a possible insulator with multiple transcription factor (TF) binding sites. Region 2 (ch20:7118172-7119146) is hypersensitive to DNase and contains potential TF binding sites. Region 3 (ch20:7127018-7128451) is highly conserved among vertebrates with weak enhancer marks and several TF site. Region 4 (ch20:7130609-7131082) also demonstrates excellent conservation, but no known TF binding. Regions 2-4 are all within the haplotype block, while region 1 is telomeric of it (Figure courtesy of Douglas Mortlock, Vanderbilt University)

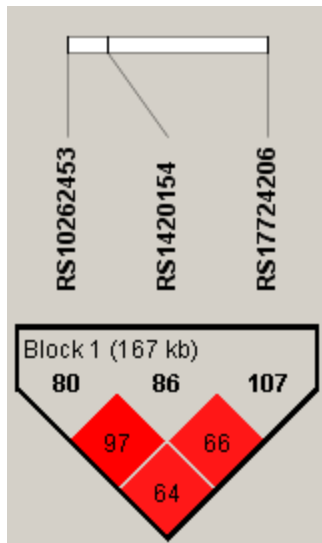

**Supplementary Figure 4.** Linkage disequilibrium pattern ( $r^2$ ) for genome-wide significant ( $P < 5 \times 10^{-8}$ ) SNPs on 7p14.3

**Supplementary Table 1: Results from two-way gene-gene interaction tests.**

| SNP1      | SNP2      | Epistatic<br><i>P</i> -value | SNP1 |                 |                  | SNP2 |                 |                  |
|-----------|-----------|------------------------------|------|-----------------|------------------|------|-----------------|------------------|
|           |           |                              | chr. | bp <sup>a</sup> | MAF <sup>b</sup> | chr. | bp <sup>a</sup> | MAF <sup>b</sup> |
| rs142092  | rs761647  | 0.001495                     | 20   | 7041432         | 0.47             | 2    | 113989575       | 0.40             |
| rs2207719 | rs761647  | 0.002801                     | 20   | 7040386         | 0.47             | 2    | 113989575       | 0.36             |
| rs8017520 | rs7793862 | 0.003839                     | 14   | 77440635        | 0.30             | 7    | 33270743        | 0.11             |
| rs9933242 | rs1160006 | 0.004746                     | 16   | 51053221        | 0.34             | 1    | 231799950       | 0.43             |
| rs6054814 | rs7753    | 0.009449                     | 20   | 7146501         | 0.36             | 3    | 198254194       | 0.47             |

<sup>a</sup>map positions from dbSNP build 130; <sup>b</sup>MAF, minor allele frequencies in the discovery cohort

Supplementary Table 2: All discovery SNPs  $P < 1.0 \times 10^{-5}$  and replication SNPs.

| SNP <sup>a</sup> | Gene                  | Allele | Chr. | Position    | Discovery p-value     | Case <sup>b</sup> | Control <sup>b</sup> | Passed replication assay? | Replication p-value   | Replicated p<0.05? |
|------------------|-----------------------|--------|------|-------------|-----------------------|-------------------|----------------------|---------------------------|-----------------------|--------------------|
| rs1884302        | 345 kb 3' of BMP2     | C/T    | 20   | 7,054,289   | $1.1 \times 10^{-14}$ | 172               | 547                  | passed                    | $4.4 \times 10^{-31}$ | Yes                |
| rs1884303        | 345 kb 3' of BMP2     | G/A    | 20   | 7,054,353   | $2.6 \times 10^{-14}$ |                   |                      | not selected              |                       |                    |
| rs932517         | 357 kb 3' of BMP2     | C/T    | 20   | 7,066,235   | $4.0 \times 10^{-14}$ |                   |                      | not selected              |                       |                    |
| rs6038729        | 376 kb 3' of BMP2     | C/A    | 20   | 7,085,757   | $1.4 \times 10^{-12}$ |                   |                      | not selected              |                       |                    |
| rs6054770        | 370 kb 3' of BMP2     | A/G    | 20   | 7,079,752   | $3.0 \times 10^{-12}$ |                   |                      | not selected              |                       |                    |
| rs6038724        | 368 kb 3' of BMP2     | C/T    | 20   | 7,077,738   | $4.2 \times 10^{-12}$ |                   |                      | not selected              |                       |                    |
| rs6054777        | 375 kb 3' of BMP2     | A/G    | 20   | 7,084,244   | $4.2 \times 10^{-12}$ |                   |                      | not selected              |                       |                    |
| rs6107929        | 360 kb 3' of BMP2     | G/A    | 20   | 7,069,672   | $1.1 \times 10^{-11}$ | 172               | 547                  | passed                    | $9.0 \times 10^{-25}$ | Yes                |
| rs179753         | 391 kb 3' of BMP2     | C/T    | 20   | 7,099,968   | $1.9 \times 10^{-11}$ | 167               | 542                  | passed                    | $5.0 \times 10^{-24}$ | Yes                |
| rs2326905        | 449 kb 3' of BMP2     | C/T    | 20   | 7,158,137   | $2.6 \times 10^{-11}$ |                   |                      | not selected              |                       |                    |
| rs6140226        | 465 kb 3' of BMP2     | T/C    | 20   | 7,174,483   | $3.4 \times 10^{-11}$ | 172               | 548                  | passed                    | $1.4 \times 10^{-11}$ | Yes                |
| rs6117669        | 408 kb 3' of BMP2     | A/G    | 20   | 7,117,791   | $5.7 \times 10^{-11}$ |                   |                      | not selected              |                       |                    |
| rs6054814        | 437 kb 3' of BMP2     | G/T    | 20   | 7,146,501   | $6.1 \times 10^{-11}$ | 171               | 545                  | passed                    | $4.1 \times 10^{-20}$ | Yes                |
| rs10262453       | BBS9                  | C/A    | 7    | 33,222,564  | $1.6 \times 10^{-10}$ | 172               | 548                  | passed                    | $3.5 \times 10^{-14}$ | Yes                |
| rs4140470        | 446 kb 3' of BMP2     | G/T    | 20   | 7,155,479   | $2.2 \times 10^{-10}$ | 171               | 543                  | passed                    | $1.3 \times 10^{-12}$ | Yes                |
| rs1420154        | BBS9                  | T/C    | 7    | 33,257,456  | $2.5 \times 10^{-10}$ | 171               | 546                  | passed                    | $2.7 \times 10^{-13}$ | Yes                |
| rs983661         | 447 kb 3' of BMP2     | G/A    | 20   | 7,156,508   | $3.0 \times 10^{-10}$ |                   |                      | not selected              |                       |                    |
| rs2144344        | 448 kb 3' of BMP2     | G/A    | 20   | 7,156,971   | $3.0 \times 10^{-10}$ |                   |                      | not selected              |                       |                    |
| rs1569863        | 457 kb 3' of BMP2     | A/G    | 20   | 7,166,508   | $3.0 \times 10^{-10}$ |                   |                      | not selected              |                       |                    |
| rs4813818        | 450 kb 3' of BMP2     | A/G    | 20   | 7,159,515   | $6.1 \times 10^{-10}$ |                   |                      | not selected              |                       |                    |
| rs17724206       | BBS9                  | A/G    | 7    | 33,390,286  | $1.5 \times 10^{-9}$  |                   |                      | failed                    |                       |                    |
| rs7649443        | DLG1                  | C/T    | 3    | 198,416,218 | $7.5 \times 10^{-9}$  | 171               | 545                  | passed                    | 0.2                   | No                 |
| rs12152266       | DLG1                  | T/C    | 3    | 198,395,758 | $8.3 \times 10^{-9}$  |                   |                      | not selected              |                       |                    |
| rs2207584        | 447 kb 3' of BMP2     | G/A    | 20   | 7,156,149   | $8.6 \times 10^{-9}$  |                   |                      | not selected              |                       |                    |
| rs9826379        | DLG1                  | C/T    | 3    | 198,311,645 | $1.6 \times 10^{-7}$  | 172               | 547                  | passed                    | 0.22                  | No                 |
| rs2341184        | DLG1                  | G/A    | 3    | 198,415,178 | $1.7 \times 10^{-7}$  |                   |                      | not selected              |                       |                    |
| rs7793096        | BBS9                  | A/G    | 7    | 33,249,102  | $1.7 \times 10^{-7}$  |                   |                      | not selected              |                       |                    |
| rs10254116       | BBS9                  | C/T    | 7    | 33,204,014  | $2.0 \times 10^{-7}$  | 161               | 529                  | passed                    | $4.5 \times 10^{-11}$ | Yes                |
| rs12536844       | BBS9                  | A/G    | 7    | 33,510,003  | $2.8 \times 10^{-7}$  |                   |                      | not selected              |                       |                    |
| rs1009355        | BBS9                  | A/G    | 7    | 33,185,288  | $4.2 \times 10^{-7}$  | 170               | 539                  | passed                    | $1.7 \times 10^{-10}$ | Yes                |
| rs1894872        | BBS9                  | C/T    | 7    | 33,226,684  | $4.9 \times 10^{-7}$  |                   |                      | not selected              |                       |                    |
| rs4634034        | 18 kb 5' of ARFGAP3   | G/A    | 22   | 41,504,357  | $7.1 \times 10^{-7}$  |                   |                      | failed                    |                       |                    |
| rs17597256       | 1.6 kb 5' of DLG1     | T/C    | 3    | 198,252,251 | $2.0 \times 10^{-6}$  |                   |                      | not selected              |                       |                    |
| rs4716412        | 52 kb 3' of LINC00574 | T/C    | 6    | 169,996,971 | $3.6 \times 10^{-6}$  | 172               | 547                  | passed                    | 0.0478                | No <sup>c</sup>    |
| rs2904698        | CNOT7                 | G/A    | 8    | 17,134,884  | $3.8 \times 10^{-6}$  | 167               | 530                  | passed                    | 0.298                 | No                 |
| rs11854994       | SHC4                  | A/G    | 15   | 46,986,684  | $5.1 \times 10^{-6}$  | 170               | 545                  | passed                    | 0.3                   | No                 |
| rs1029335        | VPS37A                | C/T    | 8    | 17,151,419  | $5.5 \times 10^{-6}$  |                   |                      | not selected              |                       |                    |
| rs142092         | 332 kb 3' of BMP2     | G/A    | 20   | 7,041,432   | $6.0 \times 10^{-6}$  | 171               | 545                  | passed                    | $7.9 \times 10^{-12}$ | Yes                |
| rs7641           | DLG1                  | C/G    | 3    | 198,254,379 | $7.1 \times 10^{-6}$  | 170               | 544                  | passed                    | 0.113                 | No                 |
| rs7638423        | DLG1                  | A/G    | 3    | 198,258,753 | $7.1 \times 10^{-6}$  |                   |                      | not selected              |                       |                    |
| rs7818793        | VPS37A                | T/C    | 8    | 17,155,159  | $8.6 \times 10^{-6}$  | 162               | 531                  | passed                    | 0.174                 | No                 |
| rs1108723        | ADCK1                 | G/A    | 14   | 77,400,981  | $8.6 \times 10^{-6}$  | 171               | 545                  | passed                    | 0.787                 | No                 |
| rs7457112        | CNTNAP2               | A/C    | 7    | 146,507,435 | $8.8 \times 10^{-6}$  | 163               | 540                  | passed                    | $3.2 \times 10^{-4}$  | No <sup>c</sup>    |
| rs6805920        | DLG1                  | C/A    | 3    | 198,446,726 | $9.3 \times 10^{-6}$  | 169               | 541                  | passed                    | 0.394                 | No                 |
| rs1941500        | LOC100130480          | A/G    | 18   | 6,537,131   | $9.5 \times 10^{-6}$  | 169               | 541                  | passed                    | 0.336                 | No                 |
| rs4522429        | PDILT                 | A/G    | 16   | 20,293,616  | $9.8 \times 10^{-6}$  | 171               | 535                  | passed                    | 0.0234                | No <sup>c</sup>    |

<sup>a</sup>SNPs in red were initially selected for replication

<sup>b</sup>number of cases and controls with genotype called

<sup>c</sup>SNPs with opposite direction of effect between discovery and replication analysis

**Supplementary Table 3. Results of association analysis of sNSC**

| chr. | SNP        | Alleles <sup>a</sup> | RAF <sup>c</sup> | GWAS             |                         | Replication      |                         | Meta-analysis    |                         |                         |
|------|------------|----------------------|------------------|------------------|-------------------------|------------------|-------------------------|------------------|-------------------------|-------------------------|
|      |            |                      |                  | OR (95% CI)      | <i>P</i> -value         | OR (95% CI)      | <i>P</i> -value         | OR (95% CI)      | <i>P</i> -value         | H <i>P</i> <sup>d</sup> |
| 20   | rs1884302  | <u>C</u> /T          | 0.30             | 4.58 (2.99-6.97) | 1.1 X 10 <sup>-14</sup> | 4.30 (3.33-5.56) | 4.4 X 10 <sup>-31</sup> | 4.38 (3.51-5.45) | 1.1 X 10 <sup>-39</sup> | 0.81                    |
| 20   | rs6107929  | <u>G</u> /A          | 0.20             | 3.82 (2.52-5.79) | 1.1 X 10 <sup>-11</sup> | 3.72 (2.87-4.83) | 9.0 X 10 <sup>-25</sup> | 3.75 (3.01-4.67) | 5.0 X 10 <sup>-32</sup> | 0.92                    |
| 20   | rs179753   | <u>C</u> /T          | 0.30             | 3.92 (2.55-6.03) | 1.9 X 10 <sup>-11</sup> | 3.59 (2.78-4.63) | 5.0 X 10 <sup>-24</sup> | 3.67 (2.95-4.57) | 3.4 X 10 <sup>-31</sup> | 0.73                    |
| 20   | rs6140226  | T/ <u>C</u>          | 0.49             | 0.24 (0.15-0.38) | 3.4 X 10 <sup>-11</sup> | 0.41 (0.31-0.53) | 1.4 X 10 <sup>-11</sup> | 0.36 (0.29-0.45) | 1.2 X 10 <sup>-18</sup> | 0.05                    |
| 20   | rs6054814  | <u>G</u> /T          | 0.30             | 3.74 (2.45-5.72) | 6.1 X 10 <sup>-11</sup> | 3.15 (2.45-4.04) | 4.1 X 10 <sup>-20</sup> | 3.29 (2.65-4.08) | 2.8 X 10 <sup>-27</sup> | 0.49                    |
| 20   | rs4140470  | G/ <u>T</u>          | 0.51             | 0.28 (0.18-0.42) | 2.2 X 10 <sup>-10</sup> | 0.40 (0.30-0.51) | 1.3 X 10 <sup>-12</sup> | 0.36 (0.29-0.45) | 1.5 X 10 <sup>-19</sup> | 0.16                    |
| 20   | rs142092   | <u>G</u> /A          | 0.31             | 2.39 (1.62-3.53) | 6.9 X 10 <sup>-6</sup>  | 2.35 (1.84-3.02) | 7.0 X 10 <sup>-12</sup> | 2.36 (1.92-2.91) | 7.5 X 10 <sup>-16</sup> | 0.95                    |
| 7    | rs10262453 | C/ <u>A</u>          | 0.31             | 0.20 (0.11-0.34) | 1.6 X 10 <sup>-10</sup> | 0.26 (0.18-0.37) | 3.5 X 10 <sup>-14</sup> | 0.24 (0.17-0.32) | 5.6 X 10 <sup>-20</sup> | 0.44                    |
| 7    | rs1420154  | T/ <u>C</u>          | 0.31             | 0.21 (0.12-0.36) | 2.5 X 10 <sup>-10</sup> | 0.28 (0.19-0.40) | 2.7 X 10 <sup>-13</sup> | 0.25 (0.19-0.34) | 3.1 X 10 <sup>-19</sup> | 0.38                    |
| 7    | rs10254116 | C/ <u>T</u>          | 0.33             | 0.25 (0.14-0.44) | 2.0 X 10 <sup>-7</sup>  | 0.33 (0.24-0.47) | 4.5 X 10 <sup>-11</sup> | 0.31 (0.23-0.41) | 2.2 X 10 <sup>-15</sup> | 0.44                    |
| 7    | rs1009355  | A/ <u>G</u>          | 0.46             | 0.38 (0.26-0.56) | 4.2 X 10 <sup>-7</sup>  | 0.44 (0.34-0.57) | 1.7 X 10 <sup>-10</sup> | 0.42 (0.34-0.52) | 2.2 X 10 <sup>-15</sup> | 0.56                    |

<sup>a</sup>minor allele/major allele; <sup>b</sup>from HapMap CEU, minor allele frequency/major allele frequency; <sup>c</sup>RAF (risk allele frequency) calculated from controls; <sup>d</sup>*P*-value for heterogeneity between the discovery and replication cohorts. Underlined alleles are overtransmitted in the sNSC cohort.



**Supplementary Table 4. gTDT analysis results based on additive, dominant and recessive models for GWAS SNPs in Supp. Table 3**

| SNPs                 | Genetic model | Coefficient gTDT | OR    | Lower OR (95%CI) | Upper OR (95%CI) | P-value  |
|----------------------|---------------|------------------|-------|------------------|------------------|----------|
| rs1884302<br>(Chr20) | additive      | 1.521            | 4.577 | 2.994            | 6.996            | 2.12E-12 |
|                      | dominant      | 1.814            | 6.135 | 2.630            | 14.310           | 2.69E-05 |
|                      | recessive     | 1.712            | 5.539 | 3.277            | 9.363            | 1.63E-10 |
| rs6107929<br>(Chr20) | additive      | 1.341            | 3.821 | 2.521            | 5.793            | 2.69E-10 |
|                      | dominant      | 1.434            | 4.195 | 2.199            | 8.004            | 1.36E-05 |
|                      | recessive     | 1.598            | 4.944 | 2.754            | 8.878            | 8.68E-08 |
| rs179753<br>(Chr20)  | additive      | 1.367            | 3.923 | 2.550            | 6.034            | 4.92E-10 |
|                      | dominant      | 1.734            | 5.661 | 2.413            | 13.280           | 6.76E-05 |
|                      | recessive     | 1.476            | 4.377 | 2.549            | 7.516            | 8.74E-08 |
| rs6140226<br>(Chr20) | additive      | -1.418           | 0.242 | 0.154            | 0.382            | 1.04E-09 |
|                      | dominant      | -1.517           | 0.219 | 0.131            | 0.369            | 1.03E-08 |
|                      | recessive     | -1.803           | 0.165 | 0.050            | 0.544            | 3.10E-03 |
| rs6054814<br>(Chr20) | additive      | 1.319            | 3.741 | 2.446            | 5.720            | 1.13E-09 |
|                      | dominant      | 1.557            | 4.743 | 2.135            | 10.540           | 1.32E-04 |
|                      | recessive     | 1.476            | 4.377 | 2.549            | 7.516            | 8.74E-08 |
| rs4140470<br>(Chr20) | additive      | -1.289           | 0.276 | 0.180            | 0.422            | 3.01E-09 |
|                      | dominant      | -1.424           | 0.241 | 0.146            | 0.398            | 2.92E-08 |
|                      | recessive     | -1.450           | 0.235 | 0.091            | 0.605            | 2.71E-03 |
| rs142092<br>(Chr20)  | additive      | 0.871            | 2.389 | 1.619            | 3.525            | 1.15E-05 |
|                      | dominant      | 0.553            | 1.739 | 1.023            | 2.956            | 0.04096  |
|                      | recessive     | 1.465            | 4.329 | 2.355            | 7.957            | 2.39E-06 |
| rs10262453<br>(Chr7) | additive      | -1.623           | 0.197 | 0.113            | 0.343            | 9.28E-09 |
|                      | dominant      | -1.645           | 0.193 | 0.105            | 0.354            | 1.04E-07 |
|                      | recessive     | -2.634           | 0.072 | 0.010            | 0.536            | 0.01023  |
| rs1420154<br>(Chr7)  | additive      | -1.571           | 0.208 | 0.121            | 0.356            | 1.07E-08 |
|                      | dominant      | -1.602           | 0.202 | 0.112            | 0.363            | 9.88E-08 |
|                      | recessive     | -2.587           | 0.075 | 0.010            | 0.562            | 0.01167  |
| rs10254116<br>(Chr7) | additive      | -1.386           | 0.250 | 0.142            | 0.440            | 1.57E-06 |
|                      | dominant      | -1.433           | 0.239 | 0.125            | 0.457            | 1.56E-05 |
|                      | recessive     | -1.907           | 0.149 | 0.034            | 0.640            | 0.0105   |
| rs1009355<br>(Chr7)  | additive      | -0.966           | 0.380 | 0.258            | 0.562            | 1.14E-06 |
|                      | dominant      | -1.082           | 0.339 | 0.204            | 0.562            | 2.79E-05 |
|                      | recessive     | -1.086           | 0.338 | 0.168            | 0.677            | 2.24E-03 |

**Supplementary Table 5. Imputed SNPs on 3q29 reaching genome-wide significance ( $P < 5 \times 10^{-8}$ )**

| SNP        | chr. | Position  | Nearby Gene | Distance (bp) <sup>a</sup> | Allele <sup>b</sup> | OR (95% CI)      | <i>P</i> value          |
|------------|------|-----------|-------------|----------------------------|---------------------|------------------|-------------------------|
| rs12374173 | 3    | 198300686 | DLG1        | 46858  209158              | C/T                 | 0.29 (0.18-0.46) | 2.94 X 10 <sup>-8</sup> |
| rs13099700 | 3    | 198303250 | DLG1        | 49422  206594              | G/A                 | 0.29 (0.18-0.46) | 2.94 X 10 <sup>-8</sup> |
| rs13317398 | 3    | 198308918 | DLG1        | 55090  200926              | A/G                 | 0.29 (0.18-0.46) | 2.94 X 10 <sup>-8</sup> |
| rs9826379  | 3    | 198311645 | DLG1        | 57817  198199              | C/T                 | 0.29 (0.18-0.46) | 1.95 X 10 <sup>-8</sup> |
| rs56309312 | 3    | 198314904 | DLG1        | 61076  194940              | C/T                 | 0.29 (0.18-0.46) | 1.95 X 10 <sup>-8</sup> |
| rs3906480  | 3    | 198317692 | DLG1        | 63864  192152              | G/C                 | 0.29 (0.18-0.46) | 1.95 X 10 <sup>-8</sup> |
| rs6782621  | 3    | 198323425 | DLG1        | 69597  186419              | C/T                 | 0.29 (0.18-0.46) | 1.95 X 10 <sup>-8</sup> |
| rs12631361 | 3    | 198325971 | DLG1        | 72143  183873              | A/C                 | 0.29 (0.18-0.46) | 1.95 X 10 <sup>-8</sup> |
| rs3773855  | 3    | 198352268 | DLG1        | 98440  157576              | A/G                 | 0.29 (0.18-0.46) | 3.24 X 10 <sup>-8</sup> |
| rs11185466 | 3    | 198353324 | DLG1        | 99496  156520              | A/G                 | 0.29 (0.18-0.46) | 2.94 X 10 <sup>-8</sup> |
| rs6804327  | 3    | 198355134 | DLG1        | 101306  154710             | G/C                 | 0.29 (0.18-0.46) | 3.24 X 10 <sup>-8</sup> |
| rs6771091  | 3    | 198355392 | DLG1        | 101564  154452             | C/T                 | 0.29 (0.18-0.46) | 3.24 X 10 <sup>-8</sup> |
| rs35624335 | 3    | 198367478 | DLG1        | 113650  142366             | C/T                 | 0.29 (0.18-0.46) | 1.95 X 10 <sup>-8</sup> |
| rs35429814 | 3    | 198376161 | DLG1        | 122333  133683             | A/C                 | 0.29 (0.18-0.46) | 1.95 X 10 <sup>-8</sup> |
| rs7642604  | 3    | 198376383 | DLG1        | 122555  133461             | A/G                 | 0.29 (0.18-0.46) | 1.95 X 10 <sup>-8</sup> |
| rs7634994  | 3    | 198376410 | DLG1        | 122582  133434             | C/T                 | 0.29 (0.18-0.46) | 1.95 X 10 <sup>-8</sup> |
| rs1868891  | 3    | 198386089 | DLG1        | 132261  123755             | A/G                 | 0.29 (0.18-0.46) | 1.95 X 10 <sup>-8</sup> |
| rs13070996 | 3    | 198390471 | DLG1        | 136643  119373             | T/G                 | 0.28 (0.18-0.45) | 8.52 X 10 <sup>-9</sup> |
| rs13081715 | 3    | 198391687 | DLG1        | 137859  118157             | T/G                 | 0.29 (0.18-0.46) | 1.95 X 10 <sup>-8</sup> |
| rs12152266 | 3    | 198395758 | DLG1        | 141930  114086             | T/C                 | 0.27 (0.17-0.44) | 1.01 X 10 <sup>-8</sup> |
| rs4491876  | 3    | 198401969 | DLG1        | 148141  107875             | T/C                 | 0.28 (0.17-0.44) | 9.31 X 10 <sup>-9</sup> |
| rs3821714  | 3    | 198402467 | DLG1        | 148639  107377             | C/T                 | 0.28 (0.17-0.44) | 9.31 X 10 <sup>-9</sup> |
| rs34207201 | 3    | 198406488 | DLG1        | 152660  103356             | G/C                 | 0.28 (0.17-0.44) | 9.31 X 10 <sup>-9</sup> |
| rs13080468 | 3    | 198409497 | DLG1        | 155669  100347             | T/C                 | 0.28 (0.17-0.44) | 9.31 X 10 <sup>-9</sup> |
| rs12630261 | 3    | 198409673 | DLG1        | 155845  100171             | A/T                 | 0.28 (0.17-0.44) | 9.31 X 10 <sup>-9</sup> |
| rs2341184  | 3    | 198415178 | DLG1        | 161350  94666              | C/T                 | 0.28 (0.17-0.44) | 9.31 X 10 <sup>-9</sup> |
| rs7649443  | 3    | 198416218 | DLG1        | 162390  93626              | C/T                 | 0.28 (0.17-0.44) | 9.31 X 10 <sup>-9</sup> |
| rs12632727 | 3    | 198416459 | DLG1        | 162631  93385              | T/G                 | 0.28 (0.17-0.44) | 9.31 X 10 <sup>-9</sup> |
| rs7616531  | 3    | 198424280 | DLG1        | 170452  85564              | T/C                 | 0.28 (0.17-0.44) | 9.31 X 10 <sup>-9</sup> |
| rs35136822 | 3    | 198425670 | DLG1        | 171842  84174              | A/G                 | 0.28 (0.17-0.44) | 9.31 X 10 <sup>-9</sup> |
| rs6782349  | 3    | 198433204 | DLG1        | 179376  76640              | T/C                 | 0.28 (0.17-0.44) | 9.31 X 10 <sup>-9</sup> |
| rs2044861  | 3    | 198433961 | DLG1        | 180133  75883              | T/C                 | 0.28 (0.17-0.44) | 9.31 X 10 <sup>-9</sup> |
| rs2044860  | 3    | 198434267 | DLG1        | 180439  75577              | T/C                 | 0.28 (0.17-0.44) | 9.31 X 10 <sup>-9</sup> |
| rs10461050 | 3    | 198436568 | DLG1        | 182740  73276              | C/A                 | 0.28 (0.17-0.44) | 9.31 X 10 <sup>-9</sup> |
| rs10461048 | 3    | 198437688 | DLG1        | 183860  72156              | A/T                 | 0.28 (0.17-0.44) | 9.31 X 10 <sup>-9</sup> |
| rs10489880 | 3    | 198445583 | DLG1        | 191755  64261              | G/A                 | 0.28 (0.17-0.44) | 9.31 X 10 <sup>-9</sup> |
| rs13077565 | 3    | 198451217 | DLG1        | 197389  58627              | T/C                 | 0.28 (0.18-0.45) | 2.14 X 10 <sup>-8</sup> |
| rs7624764  | 3    | 198455594 | DLG1        | 201766  54250              | C/G                 | 0.28 (0.18-0.45) | 2.14 X 10 <sup>-8</sup> |
| rs61394945 | 3    | 198458999 | DLG1        | 205171  50845              | C/A                 | 0.29 (0.19-0.47) | 4.43 X 10 <sup>-8</sup> |
| rs35112822 | 3    | 198460866 | DLG1        | 207038  48978              | T/C                 | 0.29 (0.19-0.47) | 4.43 X 10 <sup>-8</sup> |
| rs2340433  | 3    | 198461276 | DLG1        | 207448  48568              | C/A                 | 0.29 (0.19-0.47) | 4.43 X 10 <sup>-8</sup> |
| rs62282105 | 3    | 198463116 | DLG1        | 209288  46728              | C/T                 | 0.29 (0.19-0.47) | 4.43 X 10 <sup>-8</sup> |
| rs35665404 | 3    | 198466168 | DLG1        | 212340  43676              | G/A                 | 0.29 (0.19-0.47) | 4.43 X 10 <sup>-8</sup> |
| rs7619429  | 3    | 198483487 | DLG1        | 229659  26357              | T/G                 | 0.29 (0.19-0.47) | 4.43 X 10 <sup>-8</sup> |
| rs1073726  | 3    | 198485405 | DLG1        | 231577  24439              | A/G                 | 0.29 (0.19-0.47) | 4.43 X 10 <sup>-8</sup> |
| rs34121928 | 3    | 198487266 | DLG1        | 233438  22578              | C/T                 | 0.29 (0.19-0.47) | 4.43 X 10 <sup>-8</sup> |
| rs6800383  | 3    | 198489443 | DLG1        | 235615  20401              | T/C                 | 0.29 (0.19-0.47) | 4.43 X 10 <sup>-8</sup> |
| rs13072590 | 3    | 198496077 | DLG1        | 242249  13767              | A/G                 | 0.29 (0.19-0.47) | 4.43 X 10 <sup>-8</sup> |
| rs6779689  | 3    | 198498570 | DLG1        | 244742  11274              | C/T                 | 0.29 (0.19-0.47) | 4.43 X 10 <sup>-8</sup> |
| rs34305944 | 3    | 198499815 | DLG1        | 245987  10029              | A/C                 | 0.29 (0.19-0.47) | 4.43 X 10 <sup>-8</sup> |
| rs6782876  | 3    | 198505543 | DLG1        | 251715  4301               | G/A                 | 0.29 (0.19-0.47) | 4.43 X 10 <sup>-8</sup> |
| rs3915512  | 3    | 198506637 | DLG1        | 252809  3207               | T/A                 | 0.29 (0.19-0.47) | 4.43 X 10 <sup>-8</sup> |

<sup>a</sup>from start of gene||from end of gene; <sup>b</sup>minor allele/major allele

## Supplementary Table 6. Sequencing Primers

### A. *BMP2* primers

---

|            |                                |            |                                 |
|------------|--------------------------------|------------|---------------------------------|
| BMP2PCR1FW | 5' - AGACTCGTGAGTGTGCCAAG - 3' | BMP2PCR1RV | 5' - GGCCAAGCTGCCTCTACA - 3'    |
| BMP2PCR2FW | 5' - GCCACCTGGAAGCAGTATTC - 3' | BMP2PCR2RV | 5' - TGTTTTCCCAACTTCTTTTCG - 3' |

---

### B. *BBS9* cDNA primers

---

|            |                                    |            |                                    |
|------------|------------------------------------|------------|------------------------------------|
| BBS9PCR1FW | 5' - ATCACTGGGACCTTGTGAGGCG - 3'   | BBS9PCR1RV | 5' - CCTGCCTTTTATCGCATCTGTTGC - 3' |
| BBS9PCR2FW | 5' - GATGGTATTTGAGCAGGAGAG - 3'    | BBS9PCR2RV | 5' - TCTTTGATGATTTTCTGAAGTTC - 3'  |
| BBS9PCR3FW | 5' - GTAGCAGTAAGAGTGGGCTGTTTG - 3' | BBS9PCR3RV | 5' - CTAATTTTTCACCATTATCCGTAG - 3' |
| BBS9PCR4FW | 5' - CAGGGAGTCAAAGATTTTGCATG - 3'  | BBS9PCR4RV | 5' - AGCAGATGGATGACCAAAGGCAAC - 3' |

---
